# Supplementary material for: Evaluating the repellent effect of four botanicals against two Bactrocera species on mangoes
Source: PeerJ. 2020 Mar 4;8:e8537. doi: 10.7717/peerj.8537 (PMC7060752; doi:10.7717/peerj.8537)
Supplement: Supplemental Information 2 [file peerj-08-8537-s002.xlsx]

## Sheet: B.dorsalis
				Seriphidium brevifolium																Azadirachta indica																Piper nigrum
				0.05					0.025					0.01						0.05					0.025					0.01						0.05					0.025						0.01
				Treated	Untreated				Treated	Untreated				Treated	Untreated					Treated	Untreated				Treated	Untreated				Treated	Untreated					Treated	Untreated				Treated	Untreated					Treated	Untreated
	no. of visits	24	R1	4	11	15	26.6667	73.3333	7	8	15	46.6667	53.3333	9	10	19	47.3684	52.6316		5	8	13	38.4615	61.5385	7	8	15	46.6667	53.3333	8	9	17	47.0588	52.9412		2	8	10	20	80	1	5	6	16.6667	83.3333		4	4	8
			R2	5	11	16	31.25	68.75	6	8	14	42.8571	57.1429	11	11	22	50	50		4	9	13	30.7692	69.2308	8	7	15	53.3333	46.6667	9	7	16	56.25	43.75		0	7	7	0	100	2	4	6	33.3333	66.6667		3	5	8
			R3	4	10	14	28.5714	71.4286	8	9	17	47.0588	52.9412	11	9	20	55	45		3	9	12	25	75	6	9	15	40	60	8	7	15	53.3333	46.6667		1	8	9	11.1111	88.8889	1	6	7	14.2857	85.7143		4	5	9
			R4	5	8	13	38.4615	61.5385	7	7	14	50	50	10	10	20	50	50		5	11	16	31.25	68.75	6	7	13	46.1538	53.8462	7	8	15	46.6667	53.3333		1	9	10	10	90	2	4	6	33.3333	66.6667		2	3	5
			R5	4	10	14	28.5714	71.4286	8	8	16	50	50	9	10	19	47.3684	52.6316		5	8	13	38.4615	61.5385	7	7	14	50	50	7	8	15	46.6667	53.3333		1	6	7	14.2857	85.7143	2	4	6	33.3333	66.6667		3	4	7
			R6	5	11	16	31.25	68.75	7	9	16	43.75	56.25	8	11	19	42.1053	57.8947		4	10	14	28.5714	71.4286	7	6	13	53.8462	46.1538	7	9	16	43.75	56.25		1	7	8	12.5	87.5	2	3	5	40	60		4	3	7
			Mean	4.5	10.1667	14.6667	30.7952	69.2048	7.16667	8.16667	15.3333	46.7221	53.2779	9.66667	10.1667	19.8333	48.6404	51.3596	#DIV/0!	4.33333	9.16667	13.5	32.0856	67.9144	6.83333	7.33333	14.1667	48.3333	51.6667	7.66667	8	15.6667	48.9542	51.0458	#DIV/0!	1	7.5	8.5	11.3161	88.6839	1.66667	4.33333	6	28.4921	71.5079	#DIV/0!	3.33333	4	7.33333
			SD	0.547723	1.16905	1.21106	4.15022	4.15022	0.752773	0.752773	1.21106	3.01254	3.01254	1.21106	0.752773	1.16905	4.24465	4.24465	#DIV/0!	0.816497	1.16905	1.3784	5.40909	5.40909	0.752773	1.0328	0.983192	5.19887	5.19887	0.816497	0.894427	0.816497	4.76544	4.76544	#DIV/0!	0.632456	1.04881	1.3784	6.56443	6.56443	0.516398	1.0328	0.632456	10.4346	10.4346	#DIV/0!	0.816497	0.894427	1.36626
			SE	0.316228	0.674949	0.699206	2.39613	2.39613	0.434613	0.434613	0.699206	1.73929	1.73929	0.699206	0.434613	0.674949	2.45065	2.45065	#DIV/0!	0.471405	0.674949	0.795822	3.12294	3.12294	0.434613	0.596285	0.567646	3.00157	3.00157	0.471405	0.516398	0.471405	2.75133	2.75133	#DIV/0!	0.365148	0.60553	0.795822	3.78997	3.78997	0.298142	0.596285	0.365148	6.02443	6.02443	#DIV/0!	0.471405	0.516398	0.788811
	no. of visits	48	R1	4	9	13	30.7692	69.2308	6	7	13	46.1538	53.8462	9	9	18	50	50		3	5	8	37.5	62.5	4	8	12	33.3333	66.6667	6	7	13	46.1538	53.8462		1	10	11	9.09091	90.9091	1	5	6	16.6667	83.3333		2	7	9
			R2	5	8	13	38.4615	61.5385	7	6	13	53.8462	46.1538	9	7	16	56.25	43.75		4	6	10	40	60	5	8	13	38.4615	61.5385	5	6	11	45.4545	54.5455		0	8	8	0	100	2	6	8	25	75		2	7	9
			R3	5	8	13	38.4615	61.5385	6	8	14	42.8571	57.1429	8	8	16	50	50		5	6	11	45.4545	54.5455	6	7	13	46.1538	53.8462	6	8	14	42.8571	57.1429		1	8	9	11.1111	88.8889	1	6	7	14.2857	85.7143		2	6	8
			R4	4	7	11	36.3636	63.6364	7	7	14	50	50	7	10	17	41.1765	58.8235		4	7	11	36.3636	63.6364	4	5	9	44.4444	55.5556	5	5	10	50	50		0	9	9	0	100	1	4	5	20	80		2	7	9
			R5	4	9	13	30.7692	69.2308	6	7	13	46.1538	53.8462	8	10	18	44.4444	55.5556		3	6	9	33.3333	66.6667	4	7	11	36.3636	63.6364	4	5	9	44.4444	55.5556		1	6	7	14.2857	85.7143	1	6	7	14.2857	85.7143		3	5	8
			R6	5	8	13	38.4615	61.5385	5	7	12	41.6667	58.3333	9	9	18	50	50		3	5	8	37.5	62.5	4	8	12	33.3333	66.6667	6	6	12	50	50		1	8	9	11.1111	88.8889	2	7	9	22.2222	77.7778		2	6	8
			Mean	4.5	8.16667	12.6667	35.5478	64.4522	6.16667	7	13.1667	46.7796	53.2204	8.33333	8.83333	17.1667	48.6452	51.3548	#DIV/0!	3.66667	5.83333	9.5	38.3586	61.6414	4.5	7.16667	11.6667	38.6817	61.3183	5.33333	6.16667	11.5	46.485	53.515	#DIV/0!	0.666667	8.16667	8.83333	7.59981	92.4002	1.33333	5.66667	7	18.7434	81.2566	#DIV/0!	2.16667	6.33333	8.5
			SD	0.547723	0.752773	0.816497	3.78958	3.78958	0.752773	0.632456	0.752773	4.5303	4.5303	0.816497	1.16905	0.983192	5.23006	5.23006	#DIV/0!	0.816497	0.752773	1.3784	4.09278	4.09278	0.83666	1.16905	1.50555	5.50771	5.50771	0.816497	1.16905	1.87083	2.93963	2.93963	#DIV/0!	0.516398	1.32916	1.32916	6.11715	6.11715	0.516398	1.0328	1.41421	4.40184	4.40184	#DIV/0!	0.408248	0.816497	0.547723
			SE	0.316228	0.434613	0.471405	2.18792	2.18792	0.434613	0.365148	0.434613	2.61557	2.61557	0.471405	0.674949	0.567646	3.01958	3.01958	#DIV/0!	0.471405	0.434613	0.795822	2.36297	2.36297	0.483046	0.674949	0.869227	3.17988	3.17988	0.471405	0.674949	1.08012	1.6972	1.6972	#DIV/0!	0.298142	0.767391	0.767391	3.53174	3.53174	0.298142	0.596285	0.816497	2.5414	2.5414	#DIV/0!	0.235702	0.471405	0.316228
		Number of Puncture	R1	5	9	14	35.7143	64.2857	6	8	14	42.8571	57.1429	8	8	16	50	50		6	7	13	46.1538	53.8462	7	8	15	46.6667	53.3333	9	9	18	50	50		1	8	9	11.1111	88.8889	3	8	11	27.2727	72.7273		3	6	9
			R2	4	10	14	28.5714	71.4286	7	7	14	50	50	7	7	14	50	50		5	8	13	38.4615	61.5385	7	7	14	50	50	8	8	16	50	50		0	9	9	0	100	2	9	11	18.1818	81.8182		4	7	11
			R3	4	8	12	33.3333	66.6667	6	8	14	42.8571	57.1429	7	8	15	46.6667	53.3333		4	7	11	36.3636	63.6364	8	6	14	57.1429	42.8571	8	8	16	50	50		2	10	12	16.6667	83.3333	2	8	10	20	80		4	10	14
			R4	6	10	16	37.5	62.5	7	8	15	46.6667	53.3333	8	9	17	47.0588	52.9412		6	11	17	35.2941	64.7059	7	7	14	50	50	9	8	17	52.9412	47.0588		2	8	10	20	80	4	8	12	33.3333	66.6667		3	7	10
			R5	5	9	14	35.7143	64.2857	6	6	12	50	50	8	8	16	50	50		5	8	13	38.4615	61.5385	5	8	13	38.4615	61.5385	8	9	17	47.0588	52.9412		1	11	12	8.33333	91.6667	2	10	12	16.6667	83.3333		3	8	11
			R6	5	10	15	33.3333	66.6667	8	7	15	53.3333	46.6667	6	9	15	40	60		5	9	14	35.7143	64.2857	6	7	13	46.1538	53.8462	6	9	15	40	60		1	9	10	10	90	2	9	11	18.1818	81.8182		5	8	13
			Mean	4.83333	9.33333	14.1667	34.0278	65.9722	6.66667	7.33333	14	47.619	52.381	7.33333	8.16667	15.5	47.2876	52.7124	#DIV/0!	5.16667	8.33333	13.5	38.4082	61.5918	6.66667	7.16667	13.8333	48.0708	51.9292	8	8.5	16.5	48.3333	51.6667	#DIV/0!	1.16667	9.16667	10.3333	11.0185	88.9815	2.5	8.66667	11.1667	22.2727	77.7273	#DIV/0!	3.66667	7.66667	11.3333
			SD	0.752773	0.816497	1.32916	3.11388	3.11388	0.816497	0.816497	1.09545	4.24852	4.24852	0.816497	0.752773	1.04881	3.88892	3.88892	#DIV/0!	0.752773	1.50555	1.97484	4.02829	4.02829	1.0328	0.752773	0.752773	6.12748	6.12748	1.09545	0.547723	1.04881	4.4863	4.4863	#DIV/0!	0.752773	1.16905	1.36626	6.96035	6.96035	0.83666	0.816497	0.752773	6.59396	6.59396	#DIV/0!	0.816497	1.36626	1.8619
			SE	0.434613	0.471405	0.767391	1.7978	1.7978	0.471405	0.471405	0.632456	2.45288	2.45288	0.471405	0.434613	0.60553	2.24527	2.24527	#DIV/0!	0.434613	0.869227	1.14018	2.32573	2.32573	0.596285	0.434613	0.434613	3.5377	3.5377	0.632456	0.316228	0.60553	2.59017	2.59017	#DIV/0!	0.434613	0.674949	0.788811	4.01856	4.01856	0.483046	0.471405	0.434613	3.80702	3.80702	#DIV/0!	0.471405	0.788811	1.07497
		Number of pupae	R1	71	112	183	38.7978	61.2022	97	98	195	49.7436	50.2564	94	99	193	48.7047	51.2953		57	102	159	35.8491	64.1509	76	80	156	48.7179	51.2821	89	90	179	49.7207	50.2793		44	121	165	26.6667	73.3333	54	77	131	41.2214	58.7786		57	69	126
			R2	76	119	195	38.9744	61.0256	94	97	191	49.2147	50.7853	97	98	195	49.7436	50.2564		59	98	157	37.5796	62.4204	78	78	156	50	50	82	84	166	49.3976	50.6024		49	124	173	28.3237	71.6763	51	78	129	39.5349	60.4651		55	71	126
			R3	75	121	196	38.2653	61.7347	87	87	174	50	50	96	89	185	51.8919	48.1081		65	112	177	36.7232	63.2768	76	67	143	53.1469	46.8531	80	83	163	49.0798	50.9202		34	135	169	20.1183	79.8817	49	67	116	42.2414	57.7586		56	67	123
			R4	73	118	191	38.2199	61.7801	83	86	169	49.1124	50.8876	89	98	187	47.5936	52.4064		59	132	191	30.8901	69.1099	76	77	153	49.6732	50.3268	79	80	159	49.6855	50.3145		41	143	184	22.2826	77.7174	55	77	132	41.6667	58.3333		57	72	129
			R5	76	111	187	40.6417	59.3583	74	75	149	49.6644	50.3356	88	89	177	49.7175	50.2825		63	123	186	33.871	66.129	70	76	146	47.9452	52.0548	88	87	175	50.2857	49.7143		54	123	177	30.5085	69.4915	56	67	123	45.5285	54.4715		54	67	121
			R6	77	109	186	41.3978	58.6022	73	76	149	48.9933	51.0067	90	91	181	49.7238	50.2762		56	124	180	31.1111	68.8889	68	89	157	43.3121	56.6879	86	88	174	49.4253	50.5747		45	123	168	26.7857	73.2143	45	69	114	39.4737	60.5263		58	69	127
			Mean	74.6667	115	189.667	39.3828	60.6172	84.6667	86.5	171.167	49.4547	50.5453	92.3333	94	186.333	49.5625	50.4375	#DIV/0!	59.8333	115.167	175	34.3373	65.6627	74	77.8333	151.833	48.7992	51.2008	84	85.3333	169.333	49.5991	50.4009	#DIV/0!	44.5	128.167	172.667	25.7809	74.2191	51.6667	72.5	124.167	41.6111	58.3889	#DIV/0!	56.1667	69.1667	125.333
			SD	2.25093	4.93964	5.20256	1.32329	1.32329	9.9733	9.85393	19.783	0.403105	0.403105	3.82971	4.81664	6.88961	1.42277	1.42277	#DIV/0!	3.48807	13.4226	14.0428	2.86355	2.86355	4	7.08284	5.91326	3.22342	3.22342	4.24264	3.6697	7.81452	0.408467	0.408467	#DIV/0!	6.83374	8.81854	6.94742	3.87073	3.87073	4.17931	5.35724	7.78246	2.22608	2.22608	#DIV/0!	1.47196	2.04124	2.87518
			SE	1.29957	2.8519	3.0037	0.764001	0.764001	5.75809	5.68917	11.4217	0.232733	0.232733	2.21108	2.78089	3.97772	0.821438	0.821438	#DIV/0!	2.01384	7.74955	8.10761	1.65327	1.65327	2.3094	4.08928	3.41402	1.86104	1.86104	2.44949	2.1187	4.51171	0.235828	0.235828	#DIV/0!	3.94546	5.09139	4.0111	2.23476	2.23476	2.41293	3.093	4.4932	1.28523	1.28523	#DIV/0!	0.849837	1.17851	1.65999
																						1SB 2Pn 3Ai 4Q
				Seriphidium brevifolium			Azadirachta indica			Piper nigrum			Quercetin				Species	Plant	Dose	twentyfour	fourtyeight	OP	Pupae															Species	Dose	Plant	twentyfour	fourtyeight	OP	Pupae
				0.05	0.025	0.01	0.05	0.025	0.01	0.05	0.025	0.01	0.05	0.025	0.01		1	1	1	26.6667	30.7692	35.7143	38.7978															1	1	1	26.6667	30.7692	35.7143	38.7978
		24	R1	26.6667	46.6667	47.3684	38.4615	46.6667	47.0588	20	16.6667	50	45.4545	58.3333	46.6667		1	1	1	31.25	38.4615	28.5714	38.9744															1	1	1	31.25	38.4615	28.5714	38.9744
			R2	31.25	42.8571	50	30.7692	53.3333	56.25	0	33.3333	37.5	54.5455	50	50		1	1	1	28.5714	38.4615	33.3333	38.2653															1	1	1	28.5714	38.4615	33.3333	38.2653
			R3	28.5714	47.0588	55	25	40	53.3333	11.1111	14.2857	44.4444	36.3636	40	38.4615		1	1	1	38.4615	36.3636	37.5	38.2199															1	1	1	38.4615	36.3636	37.5	38.2199
			R4	38.4615	50	50	31.25	46.1538	46.6667	10	33.3333	40	33.3333	50	46.6667		1	1	1	28.5714	30.7692	35.7143	40.6417															1	1	1	28.5714	30.7692	35.7143	40.6417
			R5	28.5714	50	47.3684	38.4615	50	46.6667	14.2857	33.3333	42.8571	50	55.5556	54.5455		1	1	1	31.25	38.4615	33.3333	41.3978															1	1	1	31.25	38.4615	33.3333	41.3978
			R6	31.25	43.75	42.1053	28.5714	53.8462	43.75	12.5	40	57.1429	50	54.5455	53.3333		1	1	2	46.6667	46.1538	42.8571	49.7436															1	1	2	20	9.09091	11.1111	26.6667
			Mean	30.7952	46.7221	48.6404	32.0856	48.3333	48.9542	11.3161	28.4921	45.3241	44.9495	51.4057	48.2789		1	1	2	42.8571	53.8462	50	49.2147															1	1	2	0	0	0	28.3237
			SD	4.15022	3.01254	4.24465	5.40909	5.19887	4.76544	6.56443	10.4346	7.18289	8.39053	6.46705	5.81994		1	1	2	47.0588	42.8571	42.8571	50															1	1	2	11.1111	11.1111	16.6667	20.1183
			SE	2.39613	1.73929	2.45065	3.12294	3.00157	2.75133	3.78997	6.02443	4.14704	4.84427	3.73375	3.36014		1	1	2	50	50	46.6667	49.1124															1	1	2	10	0	20	22.2826
		48	R1	30.7692	46.1538	50	37.5	33.3333	46.1538	9.09091	16.6667	22.2222	40	50	46.1538		1	1	2	50	46.1538	50	49.6644															1	1	2	14.2857	14.2857	8.33333	30.5085
			R2	38.4615	53.8462	56.25	40	38.4615	45.4545	0	25	22.2222	36.3636	58.3333	50		1	1	2	43.75	41.6667	53.3333	48.9933															1	1	2	12.5	11.1111	10	26.7857
			R3	38.4615	42.8571	50	45.4545	46.1538	42.8571	11.1111	14.2857	25	30	60	50		1	1	3	47.3684	50	50	48.7047															1	1	3	38.4615	37.5	46.1538	35.8491
			R4	36.3636	50	41.1765	36.3636	44.4444	50	0	20	22.2222	27.2727	50	46.6667		1	1	3	50	56.25	50	49.7436															1	1	3	30.7692	40	38.4615	37.5796
			R5	30.7692	46.1538	44.4444	33.3333	36.3636	44.4444	14.2857	14.2857	37.5	28.5714	45.4545	50		1	1	3	55	50	46.6667	51.8919															1	1	3	25	45.4545	36.3636	36.7232
			R6	38.4615	41.6667	50	37.5	33.3333	50	11.1111	22.2222	25	30.7692	50	42.8571		1	1	3	50	41.1765	47.0588	47.5936															1	1	3	31.25	36.3636	35.2941	30.8901
			Mean	35.5478	46.7796	48.6452	38.3586	38.6817	46.485	7.59981	18.7434	25.6944	32.1628	52.298	47.6129		1	1	3	47.3684	44.4444	50	49.7175															1	1	3	38.4615	33.3333	38.4615	33.871
			SD	3.78958	4.5303	5.23006	4.09278	5.50771	2.93963	6.11715	4.40184	5.94146	4.94973	5.62888	2.92356		1	1	3	42.1053	50	40	49.7238															1	1	3	28.5714	37.5	35.7143	31.1111
			SE	2.18792	2.61557	3.01958	2.36297	3.17988	1.6972	3.53174	2.5414	3.4303	2.85773	3.24983	1.68792		1	2	1	20	9.09091	11.1111	26.6667															1	1	4	45.4545	40	38.8889	38.5542
		Number of Puncture	R1	35.7143	42.8571	50	46.1538	46.6667	50	11.1111	27.2727	33.3333	38.8889	56.25	52.9412		1	2	1	0	0	0	28.3237															1	1	4	54.5455	36.3636	44.4444	36
			R2	28.5714	50	50	38.4615	50	50	0	18.1818	36.3636	44.4444	53.3333	44.4444		1	2	1	11.1111	11.1111	16.6667	20.1183															1	1	4	36.3636	30	35.2941	33.8798
			R3	33.3333	42.8571	46.6667	36.3636	57.1429	50	16.6667	20	28.5714	35.2941	50	43.75		1	2	1	10	0	20	22.2826															1	1	4	33.3333	27.2727	42.8571	34.9462
			R4	37.5	46.6667	47.0588	35.2941	50	52.9412	20	33.3333	30	42.8571	52.9412	50		1	2	1	14.2857	14.2857	8.33333	30.5085															1	1	4	50	28.5714	35.7143	38.1215
			R5	35.7143	50	50	38.4615	38.4615	47.0588	8.33333	16.6667	27.2727	35.7143	43.75	50		1	2	1	12.5	11.1111	10	26.7857															1	1	4	50	30.7692	40	35.7143
			R6	33.3333	53.3333	40	35.7143	46.1538	40	10	18.1818	38.4615	40	53.3333	50		1	2	2	16.6667	16.6667	27.2727	41.2214															1	2	1	46.6667	46.1538	42.8571	49.7436
			Mean	34.0278	47.619	47.2876	38.4082	48.0708	48.3333	11.0185	22.2727	32.3338	39.5331	51.6013	48.5226		1	2	2	33.3333	25	18.1818	39.5349															1	2	1	42.8571	53.8462	50	49.2147
			SD	3.11388	4.24852	3.88892	4.02829	6.12748	4.4863	6.96035	6.59396	4.47223	3.69746	4.32695	3.61887		1	2	2	14.2857	14.2857	20	42.2414															1	2	1	47.0588	42.8571	42.8571	50
			SE	1.7978	2.45288	2.24527	2.32573	3.5377	2.59017	4.01856	3.80702	2.58204	2.13473	2.49817	2.08935		1	2	2	33.3333	20	33.3333	41.6667															1	2	1	50	50	46.6667	49.1124
		Number of pupae	R1	38.7978	49.7436	48.7047	35.8491	48.7179	49.7207	26.6667	41.2214	45.2381	38.5542	50.2825	50		1	2	2	33.3333	14.2857	16.6667	45.5285															1	2	1	50	46.1538	50	49.6644
			R2	38.9744	49.2147	49.7436	37.5796	50	49.3976	28.3237	39.5349	43.6508	36	50	50		1	2	2	40	22.2222	18.1818	39.4737															1	2	1	43.75	41.6667	53.3333	48.9933
			R3	38.2653	50	51.8919	36.7232	53.1469	49.0798	20.1183	42.2414	45.5285	33.8798	51.7045	49.7326		1	2	3	50	22.2222	33.3333	45.2381															1	2	2	16.6667	16.6667	27.2727	41.2214
			R4	38.2199	49.1124	47.5936	30.8901	49.6732	49.6855	22.2826	41.6667	44.186	34.9462	49.7268	50.2732		1	2	3	37.5	22.2222	36.3636	43.6508															1	2	2	33.3333	25	18.1818	39.5349
			R5	40.6417	49.6644	49.7175	33.871	47.9452	50.2857	30.5085	45.5285	44.6281	38.1215	50.8876	46.8927		1	2	3	44.4444	25	28.5714	45.5285															1	2	2	14.2857	14.2857	20	42.2414
			R6	41.3978	48.9933	49.7238	31.1111	43.3121	49.4253	26.7857	39.4737	45.6693	35.7143	50.5155	49.4845		1	2	3	40	22.2222	30	44.186															1	2	2	33.3333	20	33.3333	41.6667
			Mean	39.3828	49.4547	49.5625	34.3373	48.7992	49.5991	25.7809	41.6111	44.8168	36.2027	50.5195	49.3972		1	2	3	42.8571	37.5	27.2727	44.6281															1	2	2	33.3333	14.2857	16.6667	45.5285
			SD	1.32329	0.403105	1.42277	2.86355	3.22342	0.408467	3.87073	2.22608	0.800464	1.81471	0.706299	1.25595		1	2	3	57.1429	25	38.4615	45.6693															1	2	2	40	22.2222	18.1818	39.4737
			SE	0.764001	0.232733	0.821438	1.65327	1.86104	0.235828	2.23476	1.28523	0.462148	1.04772	0.407782	0.725122		1	3	1	38.4615	37.5	46.1538	35.8491															1	2	3	46.6667	33.3333	46.6667	48.7179
																	1	3	1	30.7692	40	38.4615	37.5796															1	2	3	53.3333	38.4615	50	50
																	1	3	1	25	45.4545	36.3636	36.7232															1	2	3	40	46.1538	57.1429	53.1469
																	1	3	1	31.25	36.3636	35.2941	30.8901															1	2	3	46.1538	44.4444	50	49.6732
																	1	3	1	38.4615	33.3333	38.4615	33.871															1	2	3	50	36.3636	38.4615	47.9452
																	1	3	1	28.5714	37.5	35.7143	31.1111															1	2	3	53.8462	33.3333	46.1538	43.3121
																	1	3	2	46.6667	33.3333	46.6667	48.7179															1	2	4	58.3333	50	56.25	50.2825
																	1	3	2	53.3333	38.4615	50	50															1	2	4	50	58.3333	53.3333	50
																	1	3	2	40	46.1538	57.1429	53.1469															1	2	4	40	60	50	51.7045
																	1	3	2	46.1538	44.4444	50	49.6732															1	2	4	50	50	52.9412	49.7268
																	1	3	2	50	36.3636	38.4615	47.9452															1	2	4	55.5556	45.4545	43.75	50.8876
																	1	3	2	53.8462	33.3333	46.1538	43.3121															1	2	4	54.5455	50	53.3333	50.5155
																	1	3	3	47.0588	46.1538	50	49.7207															1	3	1	47.3684	50	50	48.7047
																	1	3	3	56.25	45.4545	50	49.3976															1	3	1	50	56.25	50	49.7436
																	1	3	3	53.3333	42.8571	50	49.0798															1	3	1	55	50	46.6667	51.8919
																	1	3	3	46.6667	50	52.9412	49.6855															1	3	1	50	41.1765	47.0588	47.5936
																	1	3	3	46.6667	44.4444	47.0588	50.2857															1	3	1	47.3684	44.4444	50	49.7175
																	1	3	3	43.75	50	40	49.4253															1	3	1	42.1053	50	40	49.7238
																	1	4	1	45.4545	40	38.8889	38.5542															1	3	2	50	22.2222	33.3333	45.2381
																	1	4	1	54.5455	36.3636	44.4444	36															1	3	2	37.5	22.2222	36.3636	43.6508
																	1	4	1	36.3636	30	35.2941	33.8798															1	3	2	44.4444	25	28.5714	45.5285
																	1	4	1	33.3333	27.2727	42.8571	34.9462															1	3	2	40	22.2222	30	44.186
																	1	4	1	50	28.5714	35.7143	38.1215															1	3	2	42.8571	37.5	27.2727	44.6281
																	1	4	1	50	30.7692	40	35.7143															1	3	2	57.1429	25	38.4615	45.6693
																	1	4	2	58.3333	50	56.25	50.2825															1	3	3	47.0588	46.1538	50	49.7207
																	1	4	2	50	58.3333	53.3333	50															1	3	3	56.25	45.4545	50	49.3976
																	1	4	2	40	60	50	51.7045															1	3	3	53.3333	42.8571	50	49.0798
																	1	4	2	50	50	52.9412	49.7268															1	3	3	46.6667	50	52.9412	49.6855
																	1	4	2	55.5556	45.4545	43.75	50.8876															1	3	3	46.6667	44.4444	47.0588	50.2857
																	1	4	2	54.5455	50	53.3333	50.5155															1	3	3	43.75	50	40	49.4253
																	1	4	3	46.6667	46.1538	52.9412	50															1	3	4	46.6667	46.1538	52.9412	50
																	1	4	3	50	50	44.4444	50															1	3	4	50	50	44.4444	50
																	1	4	3	38.4615	50	43.75	49.7326															1	3	4	38.4615	50	43.75	49.7326
																	1	4	3	46.6667	46.6667	50	50.2732															1	3	4	46.6667	46.6667	50	50.2732
																	1	4	3	54.5455	50	50	46.8927															1	3	4	54.5455	50	50	46.8927
																	1	4	3	53.3333	42.8571	50	49.4845															1	3	4	53.3333	42.8571	50	49.4845
																	2	1	1	30	11.1111	38.4615	31.5789															2	1	1
																	2	1	1	37.5	22.2222	33.3333	24.7191															2	1	1
																	2	1	1	40	25	45.4545	23.5955															2	1	1
																	2	1	1	33.3333	0	18.1818	25.2874															2	1	1
																	2	1	1	33.3333	37.5	33.3333	24.6914															2	1	1
																	2	1	1	25	22.2222	25	32.6923															2	1	1
																	2	1	2	42.8571	50	50	47.6744															2	1	2
																	2	1	2	50	37.5	50	47.1154															2	1	2
																	2	1	2	50	40	50	53															2	1	2
																	2	1	2	42.8571	25	46.1538	50.5155															2	1	2
																	2	1	2	40	40	50	50.5618															2	1	2
																	2	1	2	37.5	50	36.3636	50.5747															2	1	2
																	2	1	3	50	42.8571	50	50															2	1	3
																	2	1	3	55.5556	37.5	45.4545	50															2	1	3
																	2	1	3	50	50	46.6667	49.5575															2	1	3
																	2	1	3	44.4444	42.8571	50	48.6486															2	1	3
																	2	1	3	36.3636	50	41.6667	49.5413															2	1	3
																	2	1	3	55.5556	50	50	48.7805															2	1	3
																	2	2	1	0	0	14.2857	22.449															2	1	4
																	2	2	1	12.5	25	12.5	25.5556															2	1	4
																	2	2	1	0	20	25	24.2424															2	1	4
																	2	2	1	14.2857	20	14.2857	26.4151															2	1	4
																	2	2	1	14.2857	0	27.2727	18.5567															2	1	4
																	2	2	1	14.2857	25	22.2222	20.6522															2	1	4
																	2	2	2	16.6667	37.5	16.6667	37.7551															2	2	1
																	2	2	2	28.5714	14.2857	36.3636	33															2	2	1
																	2	2	2	14.2857	33.3333	30	36.7925															2	2	1
																	2	2	2	20	20	28.5714	37.5															2	2	1
																	2	2	2	25	25	40	34.8315															2	2	1
																	2	2	2	16.6667	12.5	50	38.0435															2	2	1
																	2	2	3	40	40	30	47.0588															2	2	2
																	2	2	3	37.5	40	57.1429	41.5094															2	2	2
																	2	2	3	28.5714	37.5	45.4545	37.7778															2	2	2
																	2	2	3	40	14.2857	50	31.3725															2	2	2
																	2	2	3	33.3333	50	50	44.5545															2	2	2
																	2	2	3	28.5714	25	37.5	38.2022															2	2	2
																	2	3	1	33.3333	36.3636	22.2222	34.3434															2	2	3
																	2	3	1	22.2222	25	20	31.6327															2	2	3
																	2	3	1	30.7692	25	22.2222	32															2	2	3
																	2	3	1	33.3333	18.1818	15.3846	28.866															2	2	3
																	2	3	1	30	30	20	29.6703															2	2	3
																	2	3	1	30	20	30	26.3158															2	2	3
																	2	3	2	54.5455	44.4444	50	40.9091															2	2	4
																	2	3	2	44.4444	42.8571	44.4444	45.098															2	2	4
																	2	3	2	40	42.8571	50	45.1923															2	2	4
																	2	3	2	50	62.5	40	41.4141															2	2	4
																	2	3	2	50	37.5	45.4545	44.1176															2	2	4
																	2	3	2	40	50	30	43.2692															2	2	4
																	2	3	3	45.4545	45.4545	60	49.0385															2	3	1
																	2	3	3	50	50	46.1538	49.5327															2	3	1
																	2	3	3	54.5455	50	40	50.5051															2	3	1
																	2	3	3	50	44.4444	54.5455	49.4845															2	3	1
																	2	3	3	45.4545	54.5455	44.4444	48.4211															2	3	1
																	2	3	3	46.1538	33.3333	45.4545	49.5495															2	3	1
																	2	4	1	30	33.3333	42.8571	28.5714															2	3	2
																	2	4	1	28.5714	30	28.5714	23.4694															2	3	2
																	2	4	1	22.2222	22.2222	25	26.5306															2	3	2
																	2	4	1	27.2727	27.2727	20	26.1364															2	3	2
																	2	4	1	30	16.6667	25	28.2609															2	3	2
																	2	4	1	25	25	33.3333	26.2136															2	3	2
																	2	4	2	37.5	44.4444	36.3636	49.2188															2	3	3
																	2	4	2	37.5	42.8571	63.6364	50.4425															2	3	3
																	2	4	2	50	33.3333	50	50.3704															2	3	3
																	2	4	2	62.5	50	62.5	49.3333															2	3	3
																	2	4	2	50	62.5	42.8571	49.5935															2	3	3
																	2	4	2	60	37.5	40	47.8632															2	3	3
																	2	4	3	62.5	40	58.3333	49.2424															2	3	4
																	2	4	3	50	50	40	49.6124															2	3	4
																	2	4	3	45.4545	40	38.4615	50.3704															2	3	4
																	2	4	3	40	54.5455	54.5455	49.6241															2	3	4
																	2	4	3	44.4444	50	50	48.8722															2	3	4
																	2	4	3	44.4444	50	46.6667	49.2537															2	3	4
[truncated: 53 more columns]

## Sheet: B.correcta
				Seriphidium brevifolium																Azadirachta indica																Piper nigrum
				Treated	Untreated				Treated	Untreated				Treated	Untreated					Treated	Untreated				Treated	Untreated				Treated	Untreated					Treated	Untreated				Treated	Untreated				Treated	Untreated
		24	R1	3	7	10	30		3	4	7	42.8571		5	5	10	50			3	6	9	33.3333		6	5	11	54.5455		5	6	11	45.4545			0	7	7	0		1	5	6	16.6667		2	3	5	40
			R2	3	5	8	37.5		4	4	8	50		5	4	9	55.5556			2	7	9	22.2222		4	5	9	44.4444		5	5	10	50			1	7	8	12.5		2	5	7	28.5714		3	5	8	37.5
			R3	4	6	10	40		5	5	10	50		4	4	8	50			4	9	13	30.7692		4	6	10	40		6	5	11	54.5455			0	8	8	0		1	6	7	14.2857		2	5	7	28.5714
			R4	3	6	9	33.3333		3	4	7	42.8571		4	5	9	44.4444			4	8	12	33.3333		4	4	8	50		5	5	10	50			1	6	7	14.2857		1	4	5	20		2	3	5	40
			R5	2	4	6	33.3333		4	6	10	40		4	7	11	36.3636			3	7	10	30		5	5	10	50		5	6	11	45.4545			1	6	7	14.2857		2	6	8	25		2	4	6	33.3333
			R6	2	6	8	25		3	5	8	37.5		5	4	9	55.5556			3	7	10	30		4	6	10	40		6	7	13	46.1538			1	6	7	14.2857		1	5	6	16.6667		2	5	7	28.5714
			Mean	2.83333	5.66667	8.5	33.1944	#DIV/0!	3.66667	4.66667	8.33333	43.869	#DIV/0!	4.5	4.83333	9.33333	48.6532	#DIV/0!	#DIV/0!	3.16667	7.33333	10.5	29.943	#DIV/0!	4.5	5.16667	9.66667	46.4983	#DIV/0!	5.33333	5.66667	11	48.6014	#DIV/0!	#DIV/0!	0.666667	6.66667	7.33333	9.22619	#DIV/0!	1.33333	5.16667	6.5	20.1984	#DIV/0!	2.16667	4.16667	6.33333	34.6627
			SD	0.752773	1.0328	1.51658	5.33377	#DIV/0!	0.816497	0.816497	1.36626	5.15285	#DIV/0!	0.547723	1.16905	1.0328	7.31655	#DIV/0!	#DIV/0!	0.752773	1.0328	1.64317	4.08138	#DIV/0!	0.83666	0.752773	1.0328	5.96581	#DIV/0!	0.516398	0.816497	1.09545	3.60666	#DIV/0!	#DIV/0!	0.516398	0.816497	0.516398	7.17996	#DIV/0!	0.516398	0.752773	1.04881	5.53369	#DIV/0!	0.408248	0.983192	1.21106	5.31033
			SE	0.434613	0.596285	0.875595	3.07945	#DIV/0!	0.471405	0.471405	0.788811	2.975	#DIV/0!	0.316228	0.674949	0.596285	4.22421	#DIV/0!	#DIV/0!	0.434613	0.596285	0.948683	2.35639	#DIV/0!	0.483046	0.434613	0.596285	3.44436	#DIV/0!	0.298142	0.471405	0.632456	2.0823	#DIV/0!	#DIV/0!	0.298142	0.471405	0.298142	4.14535	#DIV/0!	0.298142	0.434613	0.60553	3.19488	#DIV/0!	0.235702	0.567646	0.699206	3.06592
		48	R1	1	8	9	11.1111		2	2	4	50		3	4	7	42.8571			4	7	11	36.3636		4	5	9	44.4444		5	6	11	45.4545			0	4	4	0		3	5	8	37.5		4	6	10	40
			R2	2	7	9	22.2222		3	5	8	37.5		3	5	8	37.5			3	9	12	25		3	4	7	42.8571		4	4	8	50			1	3	4	25		1	6	7	14.2857		2	3	5	40
			R3	2	6	8	25		2	3	5	40		4	4	8	50			2	6	8	25		3	4	7	42.8571		5	5	10	50			1	4	5	20		2	4	6	33.3333		3	5	8	37.5
			R4	0	7	7	0		1	3	4	25		3	4	7	42.8571			2	9	11	18.1818		5	3	8	62.5		4	5	9	44.4444			1	4	5	20		1	4	5	20		1	6	7	14.2857
			R5	3	5	8	37.5		2	3	5	40		3	3	6	50			3	7	10	30		3	5	8	37.5		6	5	11	54.5455			0	3	3	0		2	6	8	25		4	4	8	50
			R6	2	7	9	22.2222		3	3	6	50		5	5	10	50			2	8	10	20		4	4	8	50		3	6	9	33.3333			1	3	4	25		1	7	8	12.5		2	6	8	25
			Mean	1.66667	6.66667	8.33333	19.6759	#DIV/0!	2.16667	3.16667	5.33333	40.4167	#DIV/0!	3.5	4.16667	7.66667	45.5357	#DIV/0!	#DIV/0!	2.66667	7.66667	10.3333	25.7576	#DIV/0!	3.66667	4.16667	7.83333	46.6931	#DIV/0!	4.5	5.16667	9.66667	46.2963	#DIV/0!	#DIV/0!	0.666667	3.5	4.16667	15	#DIV/0!	1.66667	5.33333	7	23.7698	#DIV/0!	2.66667	5	7.66667	34.4643
			SD	1.0328	1.0328	0.816497	12.8024	#DIV/0!	0.752773	0.983192	1.50555	9.27586	#DIV/0!	0.83666	0.752773	1.36626	5.2671	#DIV/0!	#DIV/0!	0.816497	1.21106	1.36626	6.66598	#DIV/0!	0.816497	0.752773	0.752773	8.71542	#DIV/0!	1.04881	0.752773	1.21106	7.31655	#DIV/0!	#DIV/0!	0.516398	0.547723	0.752773	11.8322	#DIV/0!	0.816497	1.21106	1.26491	10.1258	#DIV/0!	1.21106	1.26491	1.63299	12.717
			SE	0.596285	0.596285	0.471405	7.39148	#DIV/0!	0.434613	0.567646	0.869227	5.35542	#DIV/0!	0.483046	0.434613	0.788811	3.04096	#DIV/0!	#DIV/0!	0.471405	0.699206	0.788811	3.8486	#DIV/0!	0.471405	0.434613	0.434613	5.03185	#DIV/0!	0.60553	0.434613	0.699206	4.22421	#DIV/0!	#DIV/0!	0.298142	0.316228	0.434613	6.8313	#DIV/0!	0.471405	0.699206	0.730297	5.84614	#DIV/0!	0.699206	0.730297	0.942809	7.34216
		Number of Puncture	R1	5	8	13	38.4615		6	6	12	50		7	7	14	50			2	7	9	22.2222		6	6	12	50		6	4	10	60			1	6	7	14.2857		1	5	6	16.6667		3	7	10	30
			R2	3	6	9	33.3333		5	5	10	50		5	6	11	45.4545			2	8	10	20		4	5	9	44.4444		6	7	13	46.1538			1	7	8	12.5		4	7	11	36.3636		4	3	7	57.1429
			R3	5	6	11	45.4545		7	7	14	50		7	8	15	46.6667			2	7	9	22.2222		4	4	8	50		4	6	10	40			3	9	12	25		3	7	10	30		5	6	11	45.4545
			R4	2	9	11	18.1818		6	7	13	46.1538		6	6	12	50			2	11	13	15.3846		4	6	10	40		6	5	11	54.5455			1	6	7	14.2857		2	5	7	28.5714		6	6	12	50
			R5	4	8	12	33.3333		5	5	10	50		5	7	12	41.6667			2	8	10	20		5	6	11	45.4545		4	5	9	44.4444			3	8	11	27.2727		4	6	10	40		5	5	10	50
			R6	3	9	12	25		4	7	11	36.3636		7	7	14	50			3	7	10	30		3	7	10	30		5	6	11	45.4545			2	7	9	22.2222		5	5	10	50		3	5	8	37.5
			Mean	3.66667	7.66667	11.3333	32.2941	#DIV/0!	5.5	6.16667	11.6667	47.0862	#DIV/0!	6.16667	6.83333	13	47.298	#DIV/0!	#DIV/0!	2.16667	8	10.1667	21.6382	#DIV/0!	4.33333	5.66667	10	43.3165	#DIV/0!	5.16667	5.5	10.6667	48.433	#DIV/0!	#DIV/0!	1.83333	7.16667	9	19.2611	#DIV/0!	3.16667	5.83333	9	33.6003	#DIV/0!	4.33333	5.33333	9.66667	45.0162
			SD	1.21106	1.36626	1.36626	9.65148	#DIV/0!	1.04881	0.983192	1.63299	5.47364	#DIV/0!	0.983192	0.752773	1.54919	3.38855	#DIV/0!	#DIV/0!	0.408248	1.54919	1.47196	4.79743	#DIV/0!	1.0328	1.0328	1.41421	7.53008	#DIV/0!	0.983192	1.04881	1.36626	7.37899	#DIV/0!	#DIV/0!	0.983192	1.16905	2.09762	6.34209	#DIV/0!	1.47196	0.983192	2	11.3362	#DIV/0!	1.21106	1.36626	1.8619	9.78677
			SE	0.699206	0.788811	0.788811	5.57228	#DIV/0!	0.60553	0.567646	0.942809	3.16021	#DIV/0!	0.567646	0.434613	0.894427	1.95638	#DIV/0!	#DIV/0!	0.235702	0.894427	0.849837	2.7698	#DIV/0!	0.596285	0.596285	0.816497	4.34749	#DIV/0!	0.567646	0.60553	0.788811	4.26026	#DIV/0!	#DIV/0!	0.567646	0.674949	1.21106	3.66161	#DIV/0!	0.849837	0.567646	1.1547	6.54493	#DIV/0!	0.699206	0.788811	1.07497	5.65039
		Number of pupae	R1	30	65	95	31.5789		41	45	86	47.6744		54	54	108	50			34	65	99	34.3434		45	65	110	40.9091		51	53	104	49.0385			22	76	98	22.449		37	61	98	37.7551		56	63	119	47.0588
			R2	22	67	89	24.7191		49	55	104	47.1154		55	55	110	50			31	67	98	31.6327		46	56	102	45.098		53	54	107	49.5327			23	67	90	25.5556		33	67	100	33		44	62	106	41.5094
			R3	21	68	89	23.5955		53	47	100	53		56	57	113	49.5575			32	68	100	32		47	57	104	45.1923		50	49	99	50.5051			24	75	99	24.2424		39	67	106	36.7925		34	56	90	37.7778
			R4	22	65	87	25.2874		49	48	97	50.5155		54	57	111	48.6486			28	69	97	28.866		41	58	99	41.4141		48	49	97	49.4845			28	78	106	26.4151		36	60	96	37.5		32	70	102	31.3725
			R5	20	61	81	24.6914		45	44	89	50.5618		54	55	109	49.5413			27	64	91	29.6703		45	57	102	44.1176		46	49	95	48.4211			18	79	97	18.5567		31	58	89	34.8315		45	56	101	44.5545
			R6	34	70	104	32.6923		44	43	87	50.5747		60	63	123	48.7805			25	70	95	26.3158		45	59	104	43.2692		55	56	111	49.5495			19	73	92	20.6522		35	57	92	38.0435		34	55	89	38.2022
			Mean	24.8333	66	90.8333	27.0941	#DIV/0!	46.8333	47	93.8333	49.907	#DIV/0!	55.5	56.8333	112.333	49.4213	#DIV/0!	#DIV/0!	29.5	67.1667	96.6667	30.4714	#DIV/0!	44.8333	58.6667	103.5	43.3334	#DIV/0!	50.5	51.6667	102.167	49.4219	#DIV/0!	#DIV/0!	22.3333	74.6667	97	22.9785	#DIV/0!	35.1667	61.6667	96.8333	36.3204	#DIV/0!	40.8333	60.3333	101.167	40.0792
			SD	5.74166	3.09839	7.85918	3.95909	#DIV/0!	4.30891	4.3359	7.52108	2.17205	#DIV/0!	2.34521	3.25064	5.50151	0.584871	#DIV/0!	#DIV/0!	3.39116	2.31661	3.26599	2.79878	#DIV/0!	2.04124	3.26599	3.67423	1.83027	#DIV/0!	3.27109	3.07679	6.21021	0.686212	#DIV/0!	#DIV/0!	3.61478	4.32049	5.65685	3.00976	#DIV/0!	2.85774	4.36654	6.01387	1.99417	#DIV/0!	9.26103	5.81951	11.089	5.57519
			SE	3.31495	1.78885	4.5375	2.28578	#DIV/0!	2.48775	2.50333	4.3423	1.25403	#DIV/0!	1.35401	1.87676	3.1763	0.337675	#DIV/0!	#DIV/0!	1.95789	1.33749	1.88562	1.61588	#DIV/0!	1.17851	1.88562	2.12132	1.05671	#DIV/0!	1.88856	1.77639	3.58546	0.396184	#DIV/0!	#DIV/0!	2.087	2.49444	3.26599	1.73769	#DIV/0!	1.64992	2.52102	3.47211	1.15134	#DIV/0!	5.34686	3.35989	6.40226	3.21884
																						1SB 2Pn 3Ai 4Q
				Seriphidium brevifolium			Piper nigrum			Azadirachta indica			Quercetin				Species	Plant	Dose	twentyfour	fourtyeight	OP	Pupae															Species	Dose	Plant	twentyfour	fourtyeight	OP	Pupae
				0.05	0.025	0.01	0.05	0.025	0.01	0.05	0.025	0.01	0.05	0.025	0.01		2	1	1	30	11.1111	38.4615	31.5789															2	1	1	30	11.1111	38.4615	31.5789
		24	R1	30	42.8571	50	0	16.6667	40	33.3333	54.5455	45.4545	30	37.5	62.5		2	1	1	37.5	22.2222	33.3333	24.7191															2	1	1	37.5	22.2222	33.3333	24.7191
			R2	37.5	50	55.5556	12.5	28.5714	37.5	22.2222	44.4444	50	28.5714	37.5	50		2	1	1	40	25	45.4545	23.5955															2	1	1	40	25	45.4545	23.5955
			R3	40	50	50	0	14.2857	28.5714	30.7692	40	54.5455	22.2222	50	45.4545		2	1	1	33.3333	0	18.1818	25.2874															2	1	1	33.3333	0	18.1818	25.2874
			R4	33.3333	42.8571	44.4444	14.2857	20	40	33.3333	50	50	27.2727	62.5	40		2	1	1	33.3333	37.5	33.3333	24.6914															2	1	1	33.3333	37.5	33.3333	24.6914
			R5	33.3333	40	36.3636	14.2857	25	33.3333	30	50	45.4545	30	50	44.4444		2	1	1	25	22.2222	25	32.6923															2	1	1	25	22.2222	25	32.6923
			R6	25	37.5	55.5556	14.2857	16.6667	28.5714	30	40	46.1538	25	60	44.4444		2	1	2	42.8571	50	50	47.6744															2	1	2	0	0	14.2857	22.449
			Mean	33.1944	43.869	48.6532	9.22619	20.1984	34.6627	29.943	46.4983	48.6014	27.1777	49.5833	47.8072		2	1	2	50	37.5	50	47.1154															2	1	2	12.5	25	12.5	25.5556
			SD	5.33377	5.15285	7.31655	7.17996	5.53369	5.31033	4.08138	5.96581	3.60666	3.07185	10.6556	7.87134		2	1	2	50	40	50	53															2	1	2	0	20	25	24.2424
			SE	3.07945	2.975	4.22421	4.14535	3.19488	3.06592	2.35639	3.44436	2.0823	1.77354	6.15201	4.54452		2	1	2	42.8571	25	46.1538	50.5155															2	1	2	14.2857	20	14.2857	26.4151
		48	R1	11.1111	50	42.8571	0	37.5	40	36.3636	44.4444	45.4545	33.3333	44.4444	40		2	1	2	40	40	50	50.5618															2	1	2	14.2857	0	27.2727	18.5567
			R2	22.2222	37.5	37.5	25	14.2857	40	25	42.8571	50	30	42.8571	50		2	1	2	37.5	50	36.3636	50.5747															2	1	2	14.2857	25	22.2222	20.6522
			R3	25	40	50	20	33.3333	37.5	25	42.8571	50	22.2222	33.3333	40		2	1	3	50	42.8571	50	50															2	1	3	33.3333	36.3636	22.2222	34.3434
			R4	0	25	42.8571	20	20	14.2857	18.1818	62.5	44.4444	27.2727	50	54.5455		2	1	3	55.5556	37.5	45.4545	50															2	1	3	22.2222	25	20	31.6327
			R5	37.5	40	50	0	25	50	30	37.5	54.5455	16.6667	62.5	50		2	1	3	50	50	46.6667	49.5575															2	1	3	30.7692	25	22.2222	32
			R6	22.2222	50	50	25	12.5	25	20	50	33.3333	25	37.5	50		2	1	3	44.4444	42.8571	50	48.6486															2	1	3	33.3333	18.1818	15.3846	28.866
			Mean	19.6759	40.4167	45.5357	15	23.7698	34.4643	25.7576	46.6931	46.2963	25.7492	45.1058	47.4242		2	1	3	36.3636	50	41.6667	49.5413															2	1	3	30	30	20	29.6703
			SD	12.8024	9.27586	5.2671	11.8322	10.1258	12.717	6.66598	8.71542	7.31655	5.88902	10.2805	6.01422		2	1	3	55.5556	50	50	48.7805															2	1	3	30	20	30	26.3158
			SE	7.39148	5.35542	3.04096	6.8313	5.84614	7.34216	3.8486	5.03185	4.22421	3.40003	5.93546	3.47231		2	2	1	0	0	14.2857	22.449															2	1	4	30	33.3333	42.8571	28.5714
		Number of Puncture	R1	38.4615	50	50	14.2857	16.6667	30	22.2222	50	60	42.8571	36.3636	58.3333		2	2	1	12.5	25	12.5	25.5556															2	1	4	28.5714	30	28.5714	23.4694
			R2	33.3333	50	45.4545	12.5	36.3636	57.1429	20	44.4444	46.1538	28.5714	63.6364	40		2	2	1	0	20	25	24.2424															2	1	4	22.2222	22.2222	25	26.5306
			R3	45.4545	50	46.6667	25	30	45.4545	22.2222	50	40	25	50	38.4615		2	2	1	14.2857	20	14.2857	26.4151															2	1	4	27.2727	27.2727	20	26.1364
			R4	18.1818	46.1538	50	14.2857	28.5714	50	15.3846	40	54.5455	20	62.5	54.5455		2	2	1	14.2857	0	27.2727	18.5567															2	1	4	30	16.6667	25	28.2609
			R5	33.3333	50	41.6667	27.2727	40	50	20	45.4545	44.4444	25	42.8571	50		2	2	1	14.2857	25	22.2222	20.6522															2	1	4	25	25	33.3333	26.2136
			R6	25	36.3636	50	22.2222	50	37.5	30	30	45.4545	33.3333	40	46.6667		2	2	2	16.6667	37.5	16.6667	37.7551															2	2	1	42.8571	50	50	47.6744
			Mean	32.2941	47.0862	47.298	19.2611	33.6003	45.0162	21.6382	43.3165	48.433	29.127	49.2262	48.0012		2	2	2	28.5714	14.2857	36.3636	33															2	2	1	50	37.5	50	47.1154
			SD	9.65148	5.47364	3.38855	6.34209	11.3362	9.78677	4.79743	7.53008	7.37899	8.04842	11.6239	7.87884		2	2	2	14.2857	33.3333	30	36.7925															2	2	1	50	40	50	53
			SE	5.57228	3.16021	1.95638	3.66161	6.54493	5.65039	2.7698	4.34749	4.26026	4.64676	6.71108	4.54885		2	2	2	20	20	28.5714	37.5															2	2	1	42.8571	25	46.1538	50.5155
		Number of pupae	R1	31.5789	47.6744	50	22.449	37.7551	47.0588	34.3434	40.9091	49.0385	28.5714	49.2188	49.2424		2	2	2	25	25	40	34.8315															2	2	1	40	40	50	50.5618
			R2	24.7191	47.1154	50	25.5556	33	41.5094	31.6327	45.098	49.5327	23.4694	50.4425	49.6124		2	2	2	16.6667	12.5	50	38.0435															2	2	1	37.5	50	36.3636	50.5747
			R3	23.5955	53	49.5575	24.2424	36.7925	37.7778	32	45.1923	50.5051	26.5306	50.3704	50.3704		2	2	3	40	40	30	47.0588															2	2	2	16.6667	37.5	16.6667	37.7551
			R4	25.2874	50.5155	48.6486	26.4151	37.5	31.3725	28.866	41.4141	49.4845	26.1364	49.3333	49.6241		2	2	3	37.5	40	57.1429	41.5094															2	2	2	28.5714	14.2857	36.3636	33
			R5	24.6914	50.5618	49.5413	18.5567	34.8315	44.5545	29.6703	44.1176	48.4211	28.2609	49.5935	48.8722		2	2	3	28.5714	37.5	45.4545	37.7778															2	2	2	14.2857	33.3333	30	36.7925
			R6	32.6923	50.5747	48.7805	20.6522	38.0435	38.2022	26.3158	43.2692	49.5495	26.2136	47.8632	49.2537		2	2	3	40	14.2857	50	31.3725															2	2	2	20	20	28.5714	37.5
			Mean	27.0941	49.907	49.4213	22.9785	36.3204	40.0792	30.4714	43.3334	49.4219	26.5304	49.4703	49.4959		2	2	3	33.3333	50	50	44.5545															2	2	2	25	25	40	34.8315
			SD	3.95909	2.17205	0.584871	3.00976	1.99417	5.57519	2.79878	1.83027	0.686212	1.83225	0.941816	0.511198		2	2	3	28.5714	25	37.5	38.2022															2	2	2	16.6667	12.5	50	38.0435
			SE	2.28578	1.25403	0.337675	1.73769	1.15134	3.21884	1.61588	1.05671	0.396184	1.05785	0.543758	0.29514		2	3	1	33.3333	36.3636	22.2222	34.3434															2	2	3	54.5455	44.4444	50	40.9091
																	2	3	1	22.2222	25	20	31.6327															2	2	3	44.4444	42.8571	44.4444	45.098
																	2	3	1	30.7692	25	22.2222	32															2	2	3	40	42.8571	50	45.1923
																	2	3	1	33.3333	18.1818	15.3846	28.866															2	2	3	50	62.5	40	41.4141
																	2	3	1	30	30	20	29.6703															2	2	3	50	37.5	45.4545	44.1176
																	2	3	1	30	20	30	26.3158															2	2	3	40	50	30	43.2692
																	2	3	2	54.5455	44.4444	50	40.9091															2	2	4	37.5	44.4444	36.3636	49.2188
																	2	3	2	44.4444	42.8571	44.4444	45.098															2	2	4	37.5	42.8571	63.6364	50.4425
																	2	3	2	40	42.8571	50	45.1923															2	2	4	50	33.3333	50	50.3704
																	2	3	2	50	62.5	40	41.4141															2	2	4	62.5	50	62.5	49.3333
																	2	3	2	50	37.5	45.4545	44.1176															2	2	4	50	62.5	42.8571	49.5935
																	2	3	2	40	50	30	43.2692															2	2	4	60	37.5	40	47.8632
																	2	3	3	45.4545	45.4545	60	49.0385															2	3	1	50	42.8571	50	50
																	2	3	3	50	50	46.1538	49.5327															2	3	1	55.5556	37.5	45.4545	50
																	2	3	3	54.5455	50	40	50.5051															2	3	1	50	50	46.6667	49.5575
																	2	3	3	50	44.4444	54.5455	49.4845															2	3	1	44.4444	42.8571	50	48.6486
																	2	3	3	45.4545	54.5455	44.4444	48.4211															2	3	1	36.3636	50	41.6667	49.5413
																	2	3	3	46.1538	33.3333	45.4545	49.5495															2	3	1	55.5556	50	50	48.7805
																	2	4	1	30	33.3333	42.8571	28.5714															2	3	2	40	40	30	47.0588
																	2	4	1	28.5714	30	28.5714	23.4694															2	3	2	37.5	40	57.1429	41.5094
																	2	4	1	22.2222	22.2222	25	26.5306															2	3	2	28.5714	37.5	45.4545	37.7778
																	2	4	1	27.2727	27.2727	20	26.1364															2	3	2	40	14.2857	50	31.3725
																	2	4	1	30	16.6667	25	28.2609															2	3	2	33.3333	50	50	44.5545
																	2	4	1	25	25	33.3333	26.2136															2	3	2	28.5714	25	37.5	38.2022
																	2	4	2	37.5	44.4444	36.3636	49.2188															2	3	3	45.4545	45.4545	60	49.0385
																	2	4	2	37.5	42.8571	63.6364	50.4425															2	3	3	50	50	46.1538	49.5327
																	2	4	2	50	33.3333	50	50.3704															2	3	3	54.5455	50	40	50.5051
																	2	4	2	62.5	50	62.5	49.3333															2	3	3	50	44.4444	54.5455	49.4845
																	2	4	2	50	62.5	42.8571	49.5935															2	3	3	45.4545	54.5455	44.4444	48.4211
																	2	4	2	60	37.5	40	47.8632															2	3	3	46.1538	33.3333	45.4545	49.5495
																	2	4	3	62.5	40	58.3333	49.2424															2	3	4	62.5	40	58.3333	49.2424
																	2	4	3	50	50	40	49.6124															2	3	4	50	50	40	49.6124
																	2	4	3	45.4545	40	38.4615	50.3704															2	3	4	45.4545	40	38.4615	50.3704
																	2	4	3	40	54.5455	54.5455	49.6241															2	3	4	40	54.5455	54.5455	49.6241
																	2	4	3	44.4444	50	50	48.8722															2	3	4	44.4444	50	50	48.8722
																	2	4	3	44.4444	50	46.6667	49.2537															2	3	4	44.4444	50	46.6667	49.2537
[truncated: 107 more columns]
